# Supplementary material for: Real-World Effectiveness in Hypertension and Hyperlipidemia Collaborative Management between Pharmacies and Primary Care in Portugal: A Multicenter Pragmatic Controlled Trial (USFarmácia®)
Source: MDPI journal article supplement (doi:10.3390/ijerph20156496), 2023-08-01
Supplement: s1 [file s1]

## USFarmáciaWatch Monitoring Feedback Report 12

PHARMACY AAA

00000

RECRUITED PATIENTS (Until 29-07-2019)

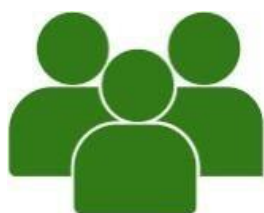

76

PATIENTS  
RECRUITED IN MY  
PHARMACY

64

PATIENTS  
RECRUITED FOR THE STUDY  
(HYPERLIPIDEMIA,  
HYPERTENSION, CVR)

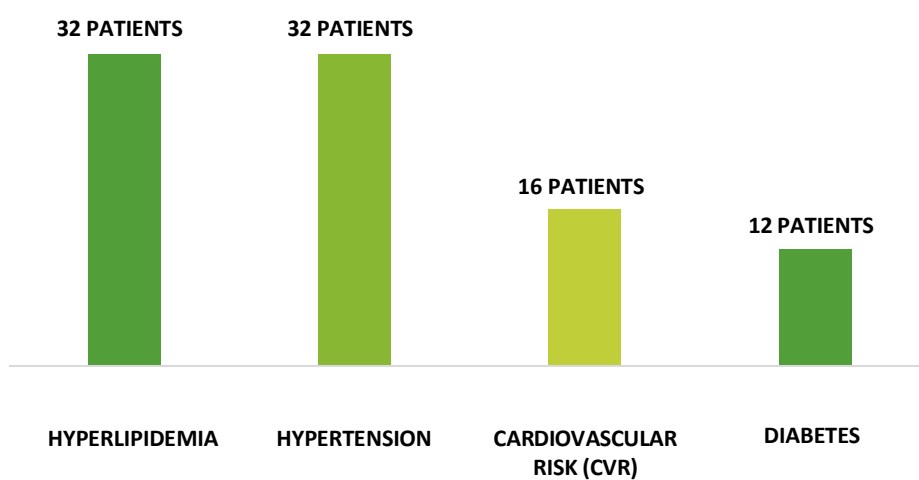

% OF UNCONTROLLED PATIENTS BASELINE VS LAST MEASUREMENT IN MY PHARMACY

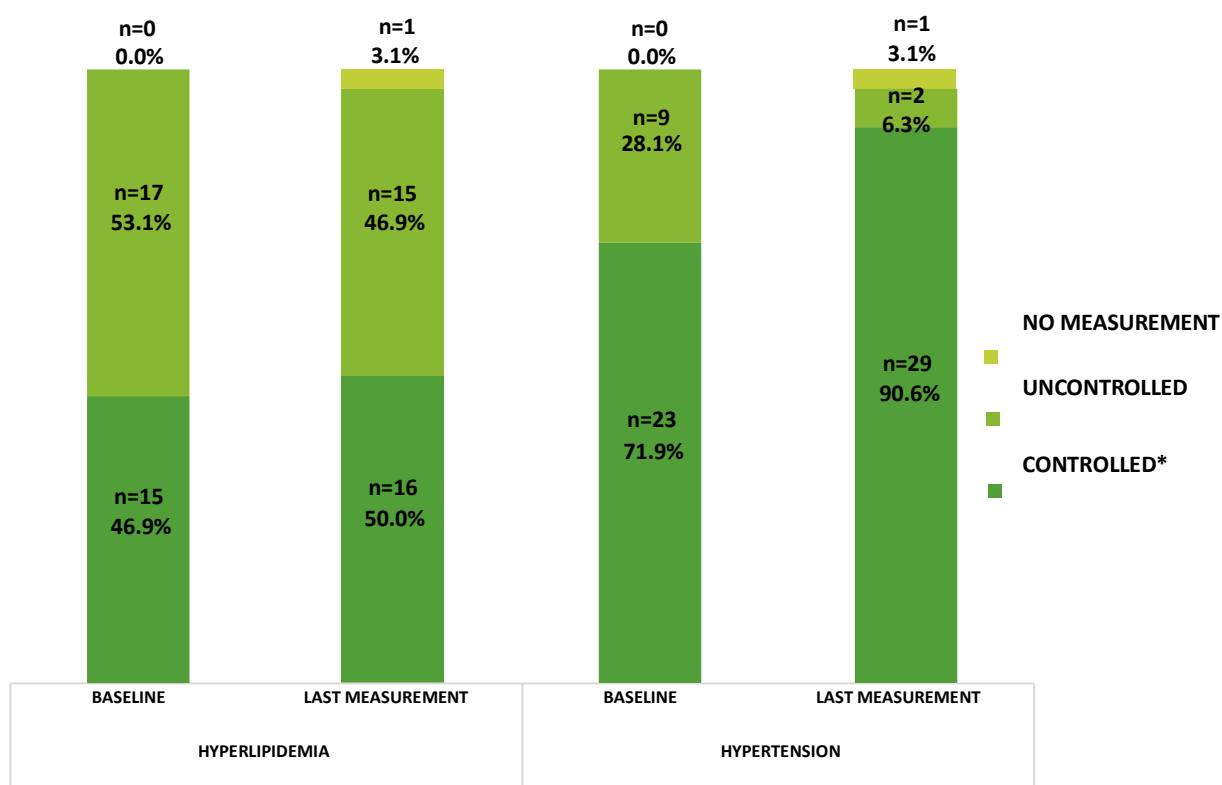

# USFarmáciaWatch Monitoring

## Feedback Report 12

PHARMACY AAA

00000

## FOLLOW-UP OF STUDY PATIENTS

| PATIENTS<br>(INITIALS+ NHS<br>NO.<br>TRUNCATED) | STUDY CONDITIONS            | DATE OF<br>RECRUITME<br>NT | HYPERLIPIDE<br>MIA      |        |     | HYPERTENSION            |      |      | DATE OF MEDICAL<br>APPOINTMENT<br>REQUESTED | STATUS OF<br>MEDICAL<br>APPOINTME<br>NT | NEXT<br>SCHEDULED<br>APPOINTMENT<br>IN PHARMACY | STATUS OF APPOINTMENT IN PHARMACY |
|-------------------------------------------------|-----------------------------|----------------------------|-------------------------|--------|-----|-------------------------|------|------|---------------------------------------------|-----------------------------------------|-------------------------------------------------|-----------------------------------|
|                                                 |                             |                            | NO.<br>MEASUR<br>EMENTS | C-LDL* | TC* | NO.<br>MEASUREMEN<br>TS | SBP* | DBP* |                                             |                                         |                                                 |                                   |
| GS288XXXX04                                     | CARDIOVASCULAR RISK         | 16-05-2018                 | 2                       | -      | 296 | 1                       | 117  | 73   | 16-03-2019                                  |                                         | 12-09-2019                                      | 12-09-2019                        |
| AG275XXXX95                                     | CARDIOVASCULAR RISK         | 17-05-2018                 | 3                       | 58     | 192 | 2                       | 112  | 74   |                                             |                                         | 27-05-2019                                      | Reschedule                        |
| FA287XXXX79                                     | HYPERLIPIDEMIA              | 17-05-2018                 | 2                       | 85     | 175 | 2                       | 132  | 78   |                                             |                                         | 07-05-2019                                      | Reschedule                        |
| JS271XXXX88                                     | HYPERLIPIDEMIA HYPERTENSION | 18-05-2018                 | 2                       | 91     | 147 | 5                       | 139  | 80   | 25-05-2018                                  | Performed                               | 12-06-2019                                      | Reschedule                        |
| JC273XXXX24                                     | HYPERLIPIDEMIA              | 21-05-2018                 | 3                       | 103    | 190 | 3                       | 130  | 78   | 22-11-2018                                  |                                         | 27-05-2019                                      | Reschedule                        |
| CL281XXXX32                                     | HYPERLIPIDEMIA HYPERTENSION | 22-05-2018                 | 2                       | 118    | 191 | 3                       | 120  | 80   | 20-12-2018                                  | Performed                               | 18-06-2019                                      | Reschedule                        |
| AA277XXXX42                                     | HYPERLIPIDEMIA              | 24-05-2018                 | 3                       | 90     | 181 | 2                       | 105  | 72   |                                             |                                         | 24-05-2019                                      | Reschedule                        |
| AP292XXXX03                                     | HYPERTENSION                | 25-05-2018                 | -                       | -      | -   | 4                       | 117  | 70   |                                             |                                         | 29-04-2019                                      | Reschedule                        |
| MT279XXXX86                                     | HYPERLIPIDEMIA              | 30-05-2018                 | 2                       | 85     | 209 | 1                       | 125  | 86   |                                             |                                         | 30-11-2019                                      | 30-11-2019                        |
| NT279XXXX27                                     | CARDIOVASCULAR RISK         | 30-05-2018                 | 1                       | 78     | 157 | 3                       | 122  | 65   |                                             |                                         | 12-06-2020                                      | 12-06-2020                        |
| ML281XXXX96                                     | HYPERLIPIDEMIA HYPERTENSION | 31-05-2018                 | 2                       | 123    | 206 | 3                       | 102  | 65   |                                             |                                         | 01-06-2019                                      | Reschedule                        |
| SS281XXXX88                                     | HYPERLIPIDEMIA HYPERTENSION | 31-05-2018                 | 2                       | 77     | 136 | 2                       | 91   | 48   |                                             |                                         | 01-06-2019                                      | Reschedule                        |
| JD363XXXX47                                     | HYPERTENSION                | 01-06-2018                 | -                       | -      | -   | 3                       | 100  | 78   |                                             |                                         | 06-09-2019                                      | 06-09-2019                        |
| OD367XXXX84                                     | CARDIOVASCULAR RISK         | 01-06-2018                 | 1                       | -      | 182 | 3                       | 113  | 95   | 07-06-2018                                  | Performed                               | 27-05-2020                                      | 27-05-2020                        |
| AG282XXXX74                                     | HYPERLIPIDEMIA HYPERTENSION | 04-06-2018                 | 3                       | -      | 218 | 3                       | 123  | 72   |                                             |                                         | 04-06-2019                                      | Reschedule                        |
| RP273XXXX97                                     | HYPERTENSION                | 04-06-2018                 | -                       | -      | -   | 3                       | 120  | 87   |                                             |                                         | 19-06-2019                                      | Reschedule                        |
| AM278XXXX50                                     | HYPERTENSION                | 06-06-2018                 | 1                       | -      | 161 | 5                       | 130  | 74   |                                             |                                         | 11-01-2020                                      | 11-01-2020                        |
| OP287XXXX38                                     | HYPERTENSION                | 07-06-2018                 | -                       | -      | -   | 3                       | 110  | 73   |                                             |                                         | 18-06-2019                                      | Reschedule                        |
| JD288XXXX78                                     | HYPERLIPIDEMIA              | 08-06-2018                 | 2                       | 112    | 167 | 1                       | 99   | 69   |                                             |                                         | 29-06-2019                                      | Reschedule                        |
| AC281XXXX54                                     | HYPERLIPIDEMIA HYPERTENSION | 12-06-2018                 | 5                       | 82     | 158 | 3                       | 139  | 82   | 21-12-2018                                  | Performed                               | 19-06-2019                                      | Reschedule                        |
| SS293XXXX40                                     | HYPERLIPIDEMIA              | 13-06-2018                 | 2                       | 137    | 214 | 1                       | 104  | 82   | 21-12-2018                                  |                                         | 19-06-2019                                      | Reschedule                        |
| MS282XXXX90                                     | HYPERLIPIDEMIA HYPERTENSION | 14-06-2018                 | 1                       | 89     | 185 | 1                       | 111  | 76   |                                             |                                         | 15-06-2019                                      | Reschedule                        |
| DC285XXXX56                                     | CARDIOVASCULAR RISK         | 16-06-2018                 | 6                       | -      | 218 | 5                       | 139  | 80   |                                             |                                         | 09-07-2020                                      | 09-07-2020                        |
| PS290XXXX36                                     | HYPERTENSION                | 21-06-2018                 | -                       | -      | -   | 5                       | 162  | 87   | 28-05-2019                                  |                                         | 19-01-2020                                      | 19-01-2020                        |
| HV289XXXX76                                     | HYPERLIPIDEMIA HYPERTENSION | 03-07-2018                 | 3                       | 56     | 136 | 3                       | 119  | 85   |                                             |                                         | 25-06-2019                                      | Reschedule                        |
| MC273XXXX08                                     | HYPERLIPIDEMIA              | 05-07-2018                 | 4                       | 53     | 152 | 1                       | 101  | 63   | 05-07-2018                                  | Performed                               | 29-01-2019                                      | Reschedule                        |
| MA281XXXX70                                     | HYPERLIPIDEMIA HYPERTENSION | 13-07-2018                 | 2                       | -      | 173 | 2                       | 138  | 71   |                                             |                                         | 30-07-2019                                      | Schedule appointment              |
| AS210XXXX30                                     | HYPERTENSION                | 16-07-2018                 | -                       | -      | -   | 2                       | 113  | 74   |                                             |                                         | 24-09-2019                                      | 24-09-2019                        |
| MM278XXXX05                                     | HYPERLIPIDEMIA HYPERTENSION | 16-07-2018                 | 3                       | 106    | 191 | 3                       | 120  | 72   |                                             |                                         | 11-01-2020                                      | 11-01-2020                        |

\*Last measurement

30-07-2019

## PHARMACY AAA

00000

## FOLLOW-UP OF STUDY PATIENTS

| PATIENTS<br>(INITIALS+ NHS NO.<br>TRUNCATED) | STUDY CONDITIONS            | DATE OF<br>RECRUITM<br>ENT | HYPERLIPIDE<br>MIA          |        |     | HYPERTENSION            |      |      | DATE OF MEDICAL<br>APPOINTMENT<br>REQUESTED | STATUS OF<br>MEDICAL<br>APPOINTME<br>NT | NEXT SCHEDULED<br>APPOINTMENT IN<br>PHARMACY | STATUS OF<br>APPOINTMENT IN<br>PHARMACY |
|----------------------------------------------|-----------------------------|----------------------------|-----------------------------|--------|-----|-------------------------|------|------|---------------------------------------------|-----------------------------------------|----------------------------------------------|-----------------------------------------|
|                                              |                             |                            | NO.<br>MEASUR<br>EME<br>NTS | C-LDL* | TC* | NO.<br>MEASUREME<br>NTS | SBP* | DBP* |                                             |                                         |                                              |                                         |
| RF279XXXX03                                  | HYPERLIPIDEMIA HYPERTENSION | 16-07-2018                 | 2                           | 94     | 184 | 2                       | 106  | 75   |                                             |                                         | 03-09-2019                                   | 03-09-2019                              |
| DF280XXXX95                                  | HYPERLIPIDEMIA              | 17-07-2018                 | 2                           | -      | 240 | 1                       | 118  | 79   |                                             |                                         | 01-08-2019                                   | 01-08-2019                              |
| FP287XXXX61                                  | HYPERTENSION                | 18-07-2018                 | -                           | -      | -   | 2                       | 122  | 84   |                                             |                                         | 23-09-2019                                   | 23-09-2019                              |
| MB282XXXX04                                  | HYPERLIPIDEMIA HYPERTENSION | 19-07-2018                 | 2                           | 124    | 197 | 2                       | 109  | 72   |                                             |                                         | 23-07-2019                                   | Reschedule                              |
| NP281XXXX10                                  | CARDIOVASCULAR RISK         | 19-07-2018                 | 2                           | 148    | 251 | 1                       | 127  | 81   |                                             |                                         | 01-10-2019                                   | 01-10-2019                              |
| AL281XXXX26                                  | HYPERLIPIDEMIA              | 20-07-2018                 | 3                           | 121    | 168 | 3                       | 88   | 55   |                                             |                                         | 23-07-2019                                   | Reschedule                              |
| MF281XXXX42                                  | HYPERLIPIDEMIA              | 23-07-2018                 | 2                           | 113    | 193 | 2                       | 104  | 83   | 02-05-2019                                  |                                         | 29-10-2019                                   | 29-10-2019                              |
| ML288XXXX88                                  | HYPERLIPIDEMIA              | 24-07-2018                 | 2                           | 102    | 178 | 2                       | 130  | 90   |                                             |                                         | 31-07-2019                                   | 31-07-2019                              |
| CR289XXXX85                                  | HYPERTENSION                | 25-07-2018                 | -                           | -      | -   | 2                       | 126  | 77   |                                             |                                         | 22-08-2019                                   | 22-08-2019                              |
| JR273XXXX16                                  | HYPERLIPIDEMIA HYPERTENSION | 25-07-2018                 | 4                           | 182    | 255 | 2                       | 128  | 79   | 30-01-2019                                  | Performed                               | 29-07-2019                                   | Reschedule                              |
| FM291XXXX70                                  | HYPERLIPIDEMIA              | 26-07-2018                 | 2                           | -      | 161 | 1                       | 115  | 83   |                                             |                                         | 26-07-2019                                   | Reschedule                              |
| MP279XXXX25                                  | HYPERLIPIDEMIA HYPERTENSION | 27-07-2018                 | 3                           | -      | 230 | 3                       | 136  | 72   | 30-01-2019                                  | Performed                               | 18-07-2019                                   | Reschedule                              |
| MS281XXXX17                                  | HYPERTENSION                | 27-07-2018                 | 2                           | 148    | 220 | 6                       | 160  | 73   | 16-08-2018                                  | Performed                               | 19-11-2019                                   | 19-11-2019                              |
| MF275XXXX94                                  | HYPERLIPIDEMIA              | 08-08-2018                 | 2                           | 78     | 141 | 2                       | 88   | 65   |                                             |                                         | 08-08-2019                                   | 08-08-2019                              |
| JB286XXXX79                                  | HYPERTENSION                | 17-08-2018                 | -                           | -      | -   | 2                       | 128  | 74   |                                             |                                         | 30-11-2019                                   | 30-11-2019                              |
| SB286XXXX87                                  | CARDIOVASCULAR RISK         | 17-08-2018                 | 1                           | 87     | 156 | 1                       | 100  | 73   |                                             |                                         | 16-08-2020                                   | 16-08-2020                              |
| ES274XXXX61                                  | CARDIOVASCULAR RISK         | 06-09-2018                 | 1                           | 144    | 222 | 1                       | 116  | 88   |                                             |                                         | 06-09-2019                                   | 06-09-2019                              |
| M282XXXX38                                   | HYPERTENSION                | 17-09-2018                 | 2                           | 85     | 186 | 2                       | 106  | 67   |                                             |                                         | 09-01-2020                                   | 09-01-2020                              |
| CP276XXXX76                                  | HYPERLIPIDEMIA HYPERTENSION | 19-09-2018                 | 4                           | 50     | 136 | 5                       | 127  | 82   |                                             |                                         | 08-11-2019                                   | 08-11-2019                              |
| AC289XXXX49                                  | CARDIOVASCULAR RISK         | 20-09-2018                 | 2                           | 119    | 202 | 1                       | 110  | 75   |                                             |                                         | 02-10-2019                                   | 02-10-2019                              |
| MP276XXXX68                                  | HYPERLIPIDEMIA              | 20-09-2018                 | 2                           | -      | 203 | 1                       | 121  | 66   |                                             |                                         | 20-12-2019                                   | 20-12-2019                              |
| NS284XXXX68                                  | CARDIOVASCULAR RISK         | 20-09-2018                 | 2                           | 114    | 195 | 1                       | 127  | 90   | 04-10-2018                                  | Performed                               | 04-11-2019                                   | 04-11-2019                              |
| AR279XXXX72                                  | HYPERTENSION                | 24-09-2018                 | 1                           | 101    | 147 | 2                       | 114  | 77   |                                             |                                         | 08-11-2019                                   | 08-11-2019                              |
| TO288XXXX83                                  | CARDIOVASCULAR RISK         | 27-09-2018                 | 2                           | 83     | 158 | 1                       | 135  | 102  | 04-10-2018                                  | Performed                               | 05-11-2019                                   | 05-11-2019                              |
| MN289XXXX17                                  | CARDIOVASCULAR RISK         | 01-10-2018                 | 1                           | 196    | 260 | 1                       | 109  | 86   |                                             |                                         | 31-05-2019                                   | Reschedule                              |
| JD281XXXX38                                  | HYPERTENSION                | 04-10-2018                 | 1                           | 154    | 244 | 3                       | 131  | 83   | 11-10-2018                                  | Performed                               | 11-10-2018                                   | Reschedule                              |
| ET291XXXX59                                  | HYPERTENSION                | 10-10-2018                 | 1                           | 77     | 164 | 2                       | 134  | 72   |                                             |                                         | 12-01-2020                                   | 12-01-2020                              |
| MR293XXXX77                                  | HYPERTENSION                | 12-10-2018                 | 1                           | 68     | 131 | 4                       | 113  | 80   |                                             |                                         | 12-01-2020                                   | 12-01-2020                              |
| PL384XXXX77                                  | CARDIOVASCULAR RISK         | 22-10-2018                 | 2                           | 161    | 259 | 1                       | 109  | 67   |                                             |                                         | 13-05-2019                                   | Reschedule                              |

00000

[illegible]
