# Supplementary material for: Real-World Effectiveness in Hypertension and Hyperlipidemia Collaborative Management between Pharmacies and Primary Care in Portugal: A Multicenter Pragmatic Controlled Trial (USFarmácia®)
Source: MDPI journal article supplement (doi:10.3390/ijerph20156496), 2023-08-01
Supplement: s1 [file s1]

**SUPPLEMENTARY FILE 4. Description of Intervention Package (as planned) based on the TIDieR (Template for Intervention Description and Replication) Checklist**

| <b>Brief Name</b>                                   | <b>Why</b>                                                                | <b>What</b>                                                                                                | <b>Who Provided</b>         | <b>How</b>         | <b>Where</b>     | <b>When and How Much</b>                                                                                      | <b>Tailoring</b>                                                                 | <b>Modifications</b>                                      | <b>How Well</b>                                                                                       |
|-----------------------------------------------------|---------------------------------------------------------------------------|------------------------------------------------------------------------------------------------------------|-----------------------------|--------------------|------------------|---------------------------------------------------------------------------------------------------------------|----------------------------------------------------------------------------------|-----------------------------------------------------------|-------------------------------------------------------------------------------------------------------|
| <b>POC</b>                                          | Defined in ICP to monitor the effectiveness                               | BP, TC, lipid profile as per training                                                                      | Pharmacists, GPs and nurses | Face-to-face       | Pharmacy and PCU | Baseline prior to recruitment + follow-up per ICP at the pharmacy, at the discretion of GPs and nurses at PCU | Tailored as per ICP (IT decision algorithm, some flexibility in time intervals   | As described in manuscript (Results, Protocol deviations) | Strategies used to improve fidelity in manuscript (Methods). Fidelity data collected for future study |
| <b>CVR assessment</b>                               | Defined in ICP as hypertension and hyperlipidemia are risk factors of CVR | CVR using SCORE as per training                                                                            | Pharmacists, GPs and nurses | Face-to-face       | Pharmacy and PCU | Per ICP at the pharmacy, at the discretion of GPs and nurses at PCU                                           | Tailored as per ICP (IT decision algorithm) , some flexibility in time intervals | As described in manuscript (Results, Protocol deviations) | Strategies used to improve fidelity in manuscript (Methods). Fidelity data collected for future study |
| <b>Medication management</b>                        | Defined in ICP to enable medication adjustments by GP                     | Checking for adherence, effectiveness, safety issues focus on anti-hypertensive and lipid-lowering therapy | Pharmacists, GPs and nurses | Face-to-face       | Pharmacy and PCU | At every pharmacy appointment and when dispensing repeat medication, at the discretion of GPs at PCU          | No                                                                               | No                                                        | Strategies used to improve fidelity in manuscript (Methods). Fidelity data collected for future study |
| <b>Referral and request for medical appointment</b> | Defined in ICP to enable medication adjustments by GP                     | Request for medical appointment as per ICP                                                                 | Pharmacists                 | IT pharmacy to PCU | Pharmacy         | Per ICP                                                                                                       | Tailored as per ICP (IT decision algorithm) , some flexibility                   | As described in manuscript (Results, Protocol deviations) | Strategies used to improve fidelity in manuscript (Methods). Fidelity data collected for future study |

|                                        |                                                                       |                                                     |                                                                       |                                                                                |                             |                                                                                   |                                             |                                                           |                                                                                                        |
|----------------------------------------|-----------------------------------------------------------------------|-----------------------------------------------------|-----------------------------------------------------------------------|--------------------------------------------------------------------------------|-----------------------------|-----------------------------------------------------------------------------------|---------------------------------------------|-----------------------------------------------------------|--------------------------------------------------------------------------------------------------------|
|                                        |                                                                       |                                                     |                                                                       |                                                                                |                             |                                                                                   | in time intervals                           |                                                           |                                                                                                        |
| <b>Lifestyle counselling</b>           | Defined in ICP as complementary intervention                          | Counseling on lifestyle modification as per ICP     | Pharmacists, GPs and nurses                                           | Face-to-face                                                                   | Pharmacy and PCU            | At every medical and pharmacy appointment and when dispensing repeat medication   | Tailored as per ICP (IT decision algorithm) | No                                                        | Strategies used to improve fidelity in manuscript (Methods). Fidelity data collected for future study. |
| <b>Request for repeat prescription</b> | Defined in ICP to minimize adherence gaps                             | Requesting repeat prescription on behalf of patient | Pharmacists                                                           | IT pharmacy to PCU                                                             | Pharmacy                    | When dispensing the last package of anti-hypertensive or lipid-lowering medicine  | No                                          | As described in manuscript (Results, Protocol deviations) | No                                                                                                     |
| <b>Feedback and follow-up</b>          | Defined in ICP to enable feedback from GP and follow-up by pharmacist | Providing feedback to pharmacist                    | GPs                                                                   | IT PCU to pharmacy                                                             | PCU                         | After medical appointment requested by pharmacist                                 | At the discretion of GP                     | As described in manuscript (Results, Protocol deviations) | Strategies used to improve fidelity in manuscript (Methods). Fidelity data collected for future study. |
| <b>Refill text reminder to patient</b> | Defined in ICP to maximize adherence                                  | Sending SMS to patient before end of last package   | Pharmacists                                                           | IT pharmacy to patient smartphone                                              | Pharmacy                    | After dispensing repeat medication + 10 days before end of last dispensed package | No                                          | No                                                        | No                                                                                                     |
| <b>Quality Circles (QC)</b>            | Defined in ICP to foster interprofessional collaboration and trust    | Interprofessional meetings                          | Pharmacists, GPs, nurses, trial monitoring team, trial research team. | Face-to-face                                                                   | Hotel near PCU & pharmacies | Kick-off QC + regular QC, as needed                                               | Flexible approach, as needed                | As described in manuscript (Results, Protocol deviations) | No                                                                                                     |
| <b>Reporting ADEs</b>                  | Requested by research team, as per legislation                        | Formal notification in case of a suspected ADE      | Pharmacists - research team - INFARMED                                | Telephone trial monitoring, email to research team, report in INFARMED website | Pharmacy, research team HQ  | Notification to INFARMED within 48 hrs.                                           | No                                          | No                                                        | No                                                                                                     |

POC: Point-of-care measurements; QC: Quality Circles; ADE: Adverse Drug Event; ICP: Integrated Care Pathway (embedded in pharmacy software); CVR: cardiovascular Risk Assessment; GP: General Practitioner; BP: Blood Pressure; TC: Total Cholesterol; IT: Information Technology; PCU: Family Health Unit (primary care unit); HQ: Headquarters.

## Example of innovative intervention components in pharmacy software as part of Integrated Care Pathway (ICP)

Atendimento nº: 260617 \*\*\* RECEITA Nº 1 \*\*\*

S/Compat. [F2] C/Compat. [F3] Suspensa [F5] Serviços [F6] Devolução [F7] Planos [F9] Opções [F11] Enc. Online [F12] SAIR [Esc]

Utente: [ ] Utentes [F10] Ficha [Ctrl+E] N.º Rec.: [ ] 07-03-2019 Loc. Pr.: UJ01613 RME [ ]

**\* ACOMPANHAMENTO \*** USF S. JULIÃO

Posologia Exceção C.

| Designação                                 | RA | CI | IN | TD | Qd | Frequência | DT | Stk | QD | P.V.P. | Iva | S | G | Z      | Líquido |
|--------------------------------------------|----|----|----|----|----|------------|----|-----|----|--------|-----|---|---|--------|---------|
| Atorvastatina Teva MG, 20 mg x 28 comp rev |    |    |    |    |    | [P] teste  |    | 0   | 0  | 1      | 6   |   |   | 100.00 | 3.500   |

**USF - Alerta de Pedido de Receita**

5317052 - Atorvastatina Teva MG, 20 mg x 28 comp rev

Doente a terminar última embalagem, sugerir pedido de nova receita na PDS

[F2] Sim, o utente quer pedir nova receita [F3] Não, o utente não quer pedir nova receita

5317052 At  
SM: 0 SMA:

| Produto [Ctrl+P]                                                             | Obs Prod [Ctrl+Q] | Info Cient [Ctrl+V] | A.T.C. [Ctrl+T] | Isaúde [Ctrl+Y] | Coa | Plano de comparticipação | N.º membro | Z |
|------------------------------------------------------------------------------|-------------------|---------------------|-----------------|-----------------|-----|--------------------------|------------|---|
| Atorvastatina [Atorvastatina Teva], 20 mg. Comprimido revestido por película |                   |                     |                 |                 | 01  | S.N.S.                   |            | 0 |

Linhas prescrição Outros dados

| Designação                                                      | Posologia | QP | QD |
|-----------------------------------------------------------------|-----------|----|----|
| Atorvastatina Teva MG, 20 mg. Comprimido revestido por película | teste     | 1  | 1  |

A data de dispensa dos medicamentos ou de prestação 1/1 N

at\*online Pesquisa ANFOnline SIF2000 2.9.5 073

**S4FIGURE 1** | Reminder in pharmacy software to request a repeat prescription to PCU

Intervenção Farmacêutica no(a): Anexo 1 - Dislipidemia - de 40 a 65 anos [Ver Fluxograma](#)

Indicações Protocolo: ☒ Marcar consulta médica em 24-48h

☐ Avaliar adesão  
- Para que serve  
- Como e quando  
- Durante quanto  
- Que cuidados e  
- Que possíveis

☐ Considerar aju  
☐ Agendar visita  
- O utente deve

Ações: Agendar Visita

Mensagem para USF

Para: USF S. JULIÃO

Assunto: URGENTE - USFarmácia

Mensagem: Utente com referência. [1678] Informação

es aos valores de consulta médica.

Mensagem enviada com sucesso!

Confirmar

[F2] - Enviar [Esc] - Sair

at\*online Pesquisa ANFOnline SIF2000 2.9.4 015 40 641 17 37

**S4FIGURE 2** | Request for a medical appointment sent from pharmacy software to PCU
