# Supplementary material for: Real-World Effectiveness in Hypertension and Hyperlipidemia Collaborative Management between Pharmacies and Primary Care in Portugal: A Multicenter Pragmatic Controlled Trial (USFarmácia®)
Source: MDPI journal article supplement (doi:10.3390/ijerph20156496), 2023-08-01
Supplement: s1 [file s1]

## SUPPLEMENTARY FILE 6. Experimental Bundled Payment Model for USFarmácia® Pharmacy Services

### Reimbursement Rules and Billing Procedure for USFarmácia® Pharmacy Services

#### RULES

Program Saúde® will reimburse 100% of the following pharmacy point-of-care assessments and visits of eligible patients in the USFarmácia® Trial according to the following rules:

| Code (CNP) | Service                        | Reimbursement Price |
|------------|--------------------------------|---------------------|
| 7942623    | Blood Pressure Measurement     | 1.50 €              |
| 7953539    | Lipid Profile Measurement      | 14.00 €             |
| 7969055    | Cardiovascular Risk Assessment | 6.25 €              |
| 7969162    | USFarmácia® Visit_T0           | 19.56 €             |
| 7969170    | USFarmácia® Visit_T6           | 9.78 €              |
| 7969188    | USFarmácia® Visit_T12          | 9.78 €              |
| 7969196    | USFarmácia® Visit_TX           | 6.52 €              |

#### CARDIOVASCULAR RISK

**Eligible Patients:** Patients 40-65 years with no medication for hypertension or hyperlipidemia and with at least one cardiovascular risk factor, as per Integrated Care Pathway (ICP), and no diabetes or medication for diabetes.

##### Eligible services per patient:

|                                      |       |
|--------------------------------------|-------|
| 1 Cardiovascular Risk Assessment     | 6.25  |
| 1 USFarmácia® Visit_T0 (First Visit) | 19.56 |
|                                      | 25.81 |

**Payment cap:** 1 pharmacy visit per patient; max. 390 total trial-eligible patients.

#### HYPERTENSION

**Eligible Patients:** Patients with no diabetes with at least one medication for hypertension (and baseline blood pressure  $\geq 140/90$  mmHg).

##### Eligible services per patient:

##### First Visit (T0):

|                              |       |
|------------------------------|-------|
| 1 Blood Pressure Measurement | 1.50  |
| 1 USFarmácia® Visit_T0       | 19.56 |
|                              | 21.06 |

##### Visit 6 $\pm$ 2 Months (T6):

|                              |       |
|------------------------------|-------|
| 1 Blood Pressure Measurement | 1.50  |
| 1 USFarmácia® Visit_T6       | 9.78  |
|                              | 11.28 |

**Visit 12 ± 2 Months (T12):**

|                                |             |
|--------------------------------|-------------|
| 1 Blood Pressure Measurement   | 1.50        |
| <u>1 USFarmácia® Visit T12</u> | <u>9.78</u> |
|                                | 11.28       |

**Extra Visit (if required for Blood Pressure Measurement, as per ICP) X± 1 Month (TX):**

|                               |             |
|-------------------------------|-------------|
| 1 Blood Pressure Measurement  | 1.50        |
| <u>1 USFarmácia® Visit TX</u> | <u>6.52</u> |
|                               | 8.02        |

**Payment cap:** 3-4 pharmacy visits per patient; max. 208 total trial-eligible patients.

## HYPERLIPIDEMIA

**Eligible Patients:** Patients with no diabetes with at least one medication for hyperlipidemia (and baseline total cholesterol ≥190 mg/dL or c-LDL ≥115 mg/dL).

**Eligible services per patient:**
**First Visit (T0):**

|                               |              |
|-------------------------------|--------------|
| 1 Lipid Profile Measurement   | 14.00        |
| <u>1 USFarmácia® Visit T0</u> | <u>19.56</u> |
|                               | 33.56        |

**Visit 6 ± 2 Months (T6):**

|                               |             |
|-------------------------------|-------------|
| 1 Lipid Profile Measurement   | 14.00       |
| <u>1 USFarmácia® Visit T6</u> | <u>9.78</u> |
|                               | 23.78       |

**Visit 12 ± 2 Months (T12):**

|                                |             |
|--------------------------------|-------------|
| 1 Lipid Profile Measurement    | 14.00       |
| <u>1 USFarmácia® Visit T12</u> | <u>9.78</u> |
|                                | 23.78       |

**Payment cap:** 3 pharmacy visits per patient; max. 234 total trial-eligible patients.

**OBS:** If a patient is simultaneously on hypertension AND hyperlipidemia medication, both point-of-care tests (blood pressure and lipid profile) are eligible for visits T0, T6, and T12.

## BILLING PROCEDURE

1. After scheduling the next visit as per ICP: go to menu **SERVICES [F6]**, identify the **eligible patient** and insert **applicable CNP code(s)**.
2. Confirm reimbursement price of point-of-care measurements (please change to your usual retail price for your other patients outside this project).  
  
OBS: Project Pharmacies will receive a plastic card with a CNP code list to affix at each sales counter for a quick reference guide.
3. Go to menu **PLANS [F9]**, select **Saúda® Reimbursement Plan (code CS)**, and insert the **patient NHS number**.  
  
OBS: This Plan will not be available for invoicing in usual pharmacy invoice batches.
4. Print invoice/receipt with the total amount (100% reimbursed).
5. Hand invoice/receipt to the patient (patient pays 0,00€).

## REIMBURSEMENT TO PHARMACIES

The amount due under this project will appear in the Saúda® invoice to the pharmacy, under “Extras”, named “USFarmácia® – Intervenções”. Payment to pharmacies will be made using e-reimbursement on two-time points: 1) Saúda® invoice February 2019 comprising project eligible services provided in 2019; 2) Saúda® final invoice at end of study follow-up (*projected date: August 2019*).

Amount billed will be subject to prior validation by Study Team to conform with Rules for Reimbursement of USFarmácia services.

## WHICH DOCUMENTS MUST PHARMACIES SEND FOR BILLING AND REIMBURSEMENT?

No document is required – billing and reimbursement will be processed electronically.

## WHAT IS THE AMOUNT DUE PER PHARMACY?

The amount due depends on the number of eligible patients who meet inclusion criteria and rules for reimbursement approved for this project.

## MORE INFORMATION:

Study Team  
Tel. XXXXX / email: XXXX
