# Supplementary material for: Real-World Effectiveness in Hypertension and Hyperlipidemia Collaborative Management between Pharmacies and Primary Care in Portugal: A Multicenter Pragmatic Controlled Trial (USFarmácia®)
Source: MDPI journal article supplement (doi:10.3390/ijerph20156496), 2023-08-01
Supplement: s1 [file s1]

### **SUPPLEMENTARY FILE 3. List of study sites**

#### **1. Intervention sites**

| <b>Intervention site</b>             | <b>Municipality (District)</b> |
|--------------------------------------|--------------------------------|
| 1. USF S. Julião da Figueira (USF)   | Figueira da Foz (Coimbra)      |
| 2. Farmácia dos Condados (Pharmacy)  | Figueira da Foz (Coimbra)      |
| 3. Farmácia Faria (Pharmacy)         | Figueira da Foz (Coimbra)      |
| 4. Farmácia Garcia (Pharmacy)        | Figueira da Foz (Coimbra)      |
| 5. Farmácia Gaspar (Pharmacy)        | Figueira da Foz (Coimbra)      |
| 6. Farmácia Goes Pinheiro (Pharmacy) | Figueira da Foz (Coimbra)      |
| 7. Farmácia Jardim (Pharmacy)        | Figueira da Foz (Coimbra)      |
| 8. Farmácia Saúde (Pharmacy)         | Figueira da Foz (Coimbra)      |

#### **2. Control geographical locations**

5 Control USFs and 13 Control Pharmacies located in the following districts: Guarda, Santarém and Viseu.

Glossary:

USF ('Unidade de Saúde Familiar'): Primary Care Unit (PCU).
